# Supplementary material for: Bicarbonate rather than high pH in growth medium induced Fe-deficiency chlorosis in dwarfing rootstock quince A (Cydonia oblonga Mill.) but did not impair Fe nutrition of vigorous rootstock Pyrus betulifolia
Source: Frontiers journal article supplement (doi:10.3389/fpls.2023.1237327), 2023-08-24
Supplement: Data_Sheet_1.PDF [file Data_Sheet_1.PDF]

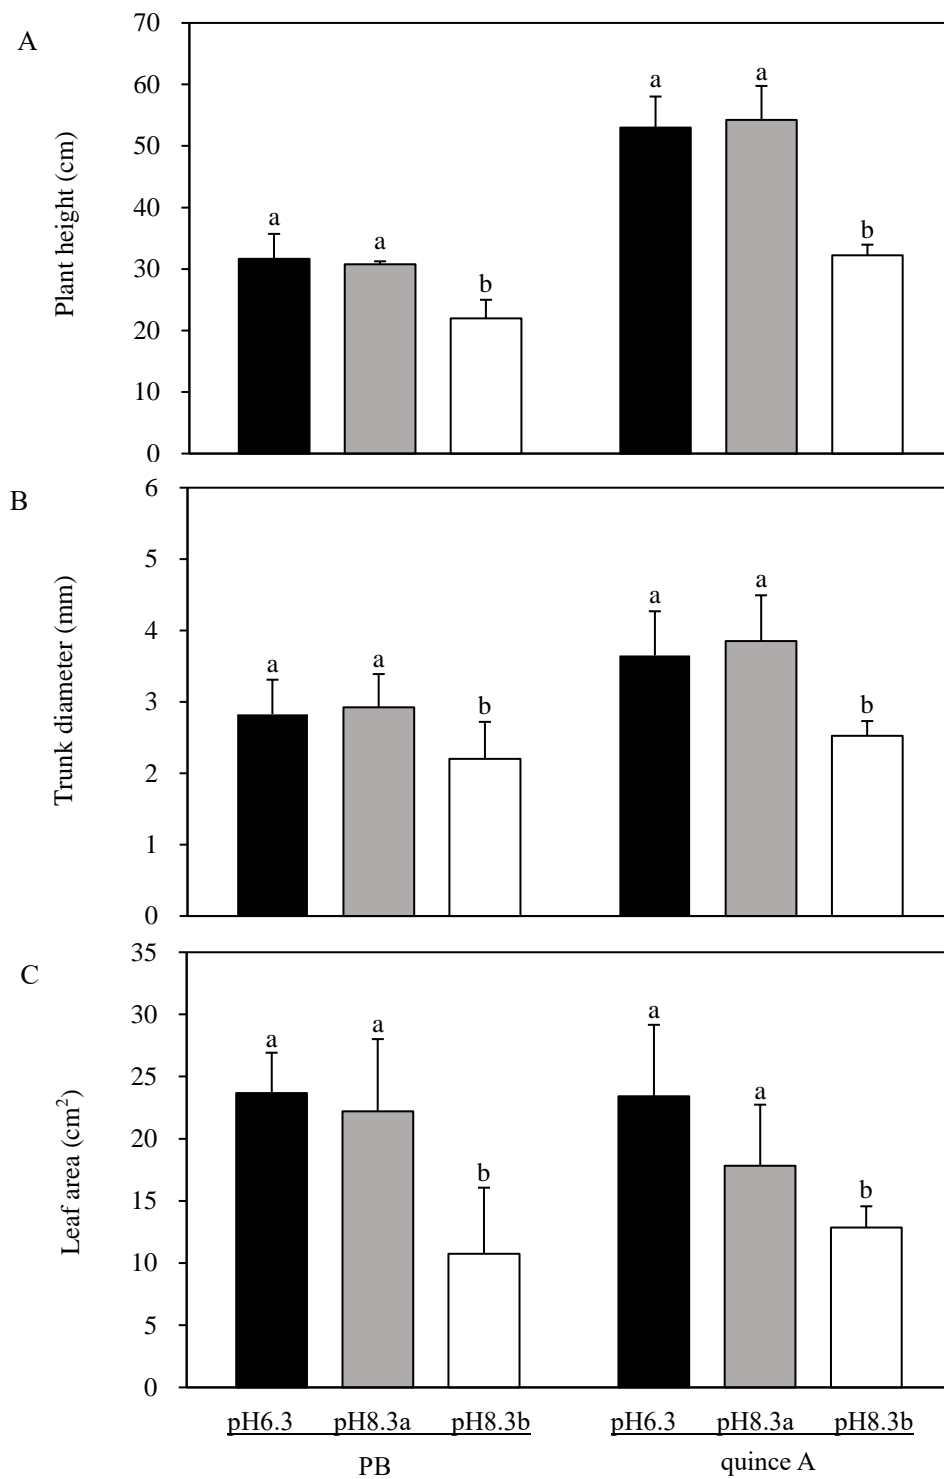

**Fig. S1** The plant height (A), trunk diameter (B) and leaf area (C) of PB and quince A grown in different treatments. The pH6.3 and pH8.3a were adjusted with KOH, whereas pH8.3b was adjusted with KHCO<sub>3</sub>. PB: *Pyrus betulifolia*. Data shown are means + SD (n=5). For each rootstock, different letters indicate significant differences among treatments at  $P < 0.05$  (Tukey's post-hoc analysis).
